# Supplementary material for: Injectable hydrogels of recombinant human collagen type III and chitosan with antibacterial and antioxidative activities for wound healing
Source: Royal Society of Chemistry journal article supplement (doi:10.1039/d3tb00176h), 2023-01-01
Supplement: d3tb00176h1.pdf [file d3tb00176h1.pdf]

**Supporting file for Injectable hydrogels of recombinant human collagen type III and chitosan with antibacterial and antioxidative activities for wound healing**

Li Xiong<sup>a,b, &</sup>, Chen Zhou<sup>a,b, &</sup>, Lei Tong<sup>a,b</sup>, Xiaowen Han<sup>a,b</sup>, Yaping Zou<sup>a,b</sup>, Zuqin Dong<sup>a,b</sup>, Jie Liang<sup>\*a,b,c</sup>, Yafang Chen<sup>\*a,b</sup>, Yujiang Fan<sup>a,b</sup>

<sup>a</sup> National Engineering Research Center for Biomaterials, Sichuan University, 29 Wangjiang Road, Chengdu, Sichuan, 610064, PR China

<sup>b</sup> College of Biomedical Engineering, Sichuan University, 29 Wangjiang Road, Chengdu, Sichuan, 610064, PR China

<sup>c</sup> Sichuan Testing Center for Biomaterials and Medical Devices, Sichuan University, 29 Wangjiang Road, Chengdu, 610064, PR China

&. These authors contributed equally to this work.

\* Corresponding authors at: Biomaterials Building, Sichuan University, Chengdu, 610064, China.

*E-mail addresses: jie\_L88@126.com, yafang.chen@scu.edu.cn*

## Results and discussion

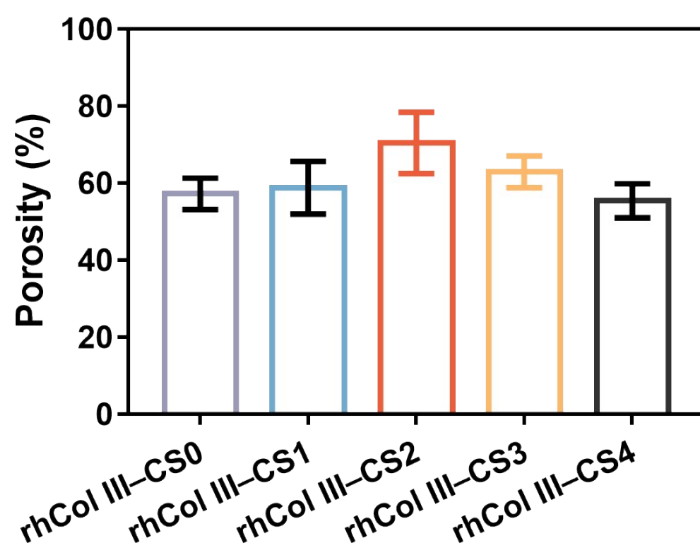

Fig. S1. Statistics of pore diameter of hydrogels.

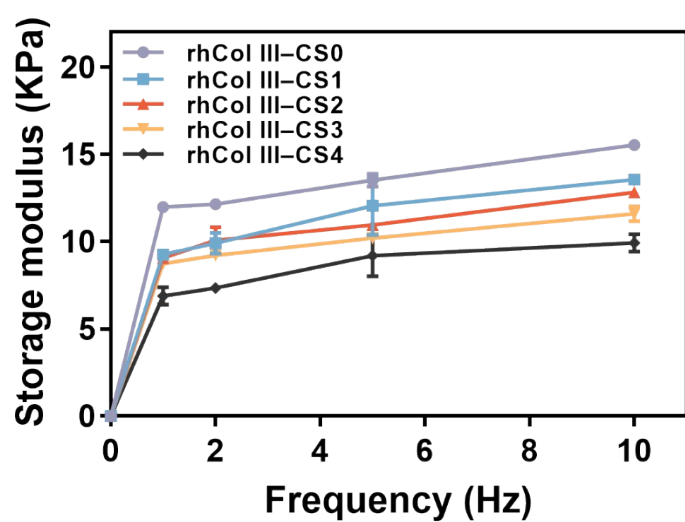

Fig. S2. The storage modulus of hydrogels.

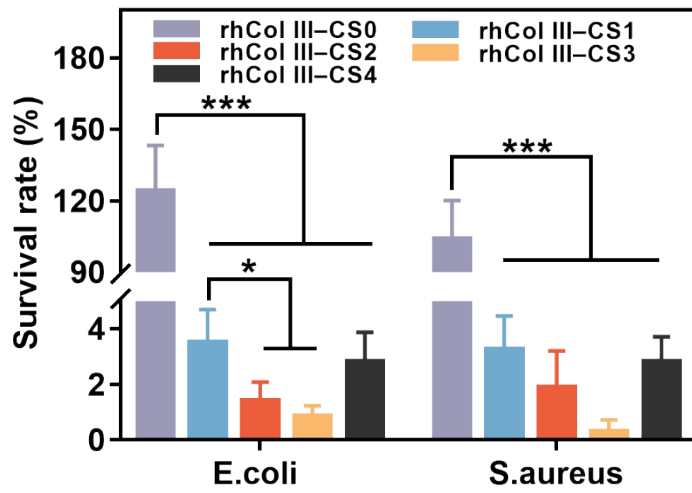

Fig. S3. The survival rates of hydrogels against *E. coli* and *S. aureus*.

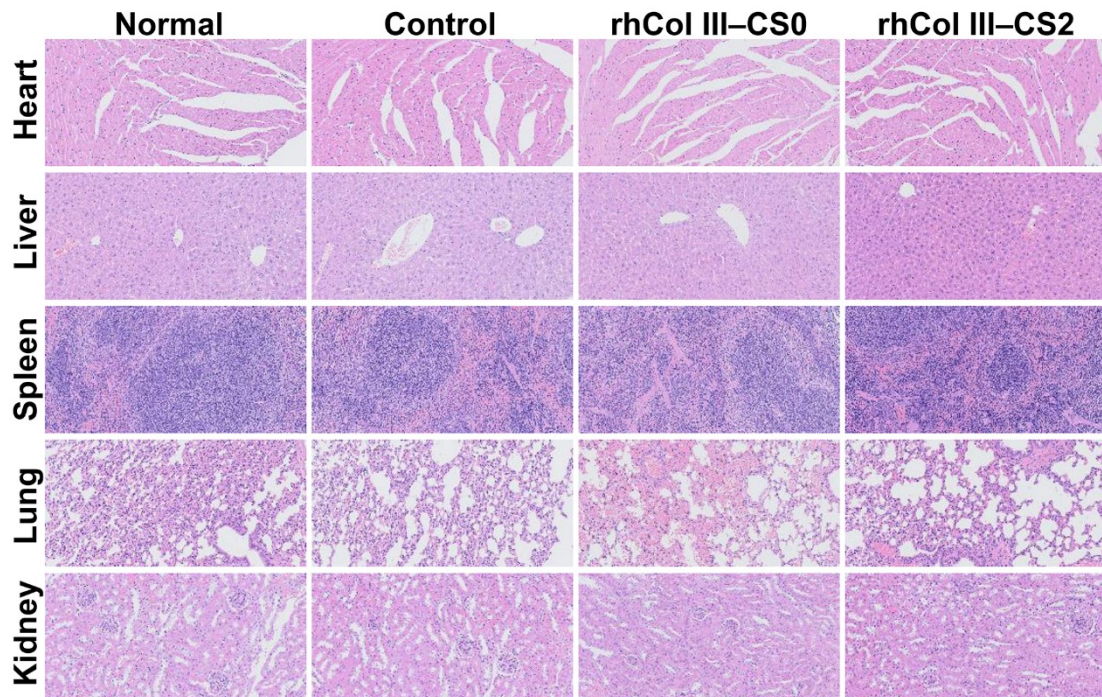

Fig. S4. H&E staining in different treatment groups of the major organs tissues on day 6.
